# Supplementary material
Source: Springer Nature journal article supplement (https://www.springermedizin.de/resource/supplementary/13063_2014_2158_MOESM2_ESM.pdf/9621494)
Supplement: MOESM2 [file 9621494]

|                                                  |                           | Study period               |                             |                             |                            |                             |
|--------------------------------------------------|---------------------------|----------------------------|-----------------------------|-----------------------------|----------------------------|-----------------------------|
|                                                  | Enrollment and allocation | Post-allocation            |                             |                             |                            | Close-out                   |
| Visit in doctor's office                         | Visit 1                   | Visit 2                    | Visit 3                     | Visit 4                     | Visit 5                    | Visit 6                     |
| Time point                                       | -7-0 day                  | the first week $\pm$ 1 day | the second week $\pm$ 2 day | the fourth week $\pm$ 2 day | the sixth week $\pm$ 2 day | the eighth week $\pm$ 2 day |
| <b>Information collection</b>                    |                           |                            |                             |                             |                            |                             |
| Written informed consent                         | ×                         |                            |                             |                             |                            |                             |
| Demographic information                          | ×                         |                            |                             |                             |                            |                             |
| Medical history                                  | ×                         |                            |                             |                             |                            |                             |
| Comorbidity                                      | ×                         |                            |                             |                             |                            |                             |
| Physical examination                             | ×                         | ×                          | ×                           | ×                           | ×                          | ×                           |
| Concomitant treatment                            | ×                         | ×                          | ×                           | ×                           | ×                          | ×                           |
| Endoscope + biopsy                               | ×                         |                            |                             |                             |                            | ×                           |
| Ultrasonography                                  | ×                         |                            |                             |                             |                            |                             |
| allocation                                       | ×                         |                            |                             |                             |                            |                             |
| <b>Interventions</b>                             |                           |                            |                             |                             |                            |                             |
| High-dose                                        |                           |                            |                             |                             |                            |                             |
| Low-dose                                         |                           |                            |                             |                             |                            |                             |
| Placebo                                          |                           |                            |                             |                             |                            |                             |
| <b>Assessments</b>                               |                           |                            |                             |                             |                            |                             |
| Clinical sign and symptom score                  | ×                         | ×                          | ×                           | ×                           | ×                          | ×                           |
| Patient-reported outcome (PRO) score             | ×                         |                            |                             |                             |                            | ×                           |
| Visual analog scale (VAS) score                  | ×                         | ×                          | ×                           | ×                           | ×                          | ×                           |
| Helicobacter pylori (HP) (14 C-urea breath test) | ×                         |                            |                             |                             |                            | ×                           |
| Complete blood cell count                        | ×                         |                            |                             | ×                           |                            | ×                           |
| Urinalysis                                       | ×                         |                            |                             | ×                           |                            | ×                           |
| stool examination and fecal occult blood test    | ×                         |                            |                             | ×                           |                            | ×                           |
| Liver function                                   | ×                         |                            |                             | ×                           |                            | ×                           |
| Renal function                                   | ×                         |                            |                             | ×                           |                            | ×                           |
| ECG                                              | ×                         |                            |                             | ×                           |                            | ×                           |
| Urine pregnancy test                             | ×                         |                            |                             | ×                           |                            | ×                           |
| Adverse event record                             |                           | ×                          | ×                           | ×                           | ×                          | ×                           |
| <b>Others</b>                                    |                           |                            |                             |                             |                            |                             |
| Drug distribution                                | ×                         | ×                          | ×                           | ×                           | ×                          |                             |
| Drug recycling and count                         |                           | ×                          | ×                           | ×                           | ×                          | ×                           |
